# Supplementary material for: Efficient Control of Zika Virus Infection Induced by a Non-Replicating Adenovector Encoding Zika Virus NS1/NS2 Antigens Fused to the MHC Class II-Associated Invariant Chain
Source: MDPI journal article supplement (doi:10.3390/v13112215), 2021-11-03

Figure S1: Representative plots: Ad-liNS1/NS2 kinetics

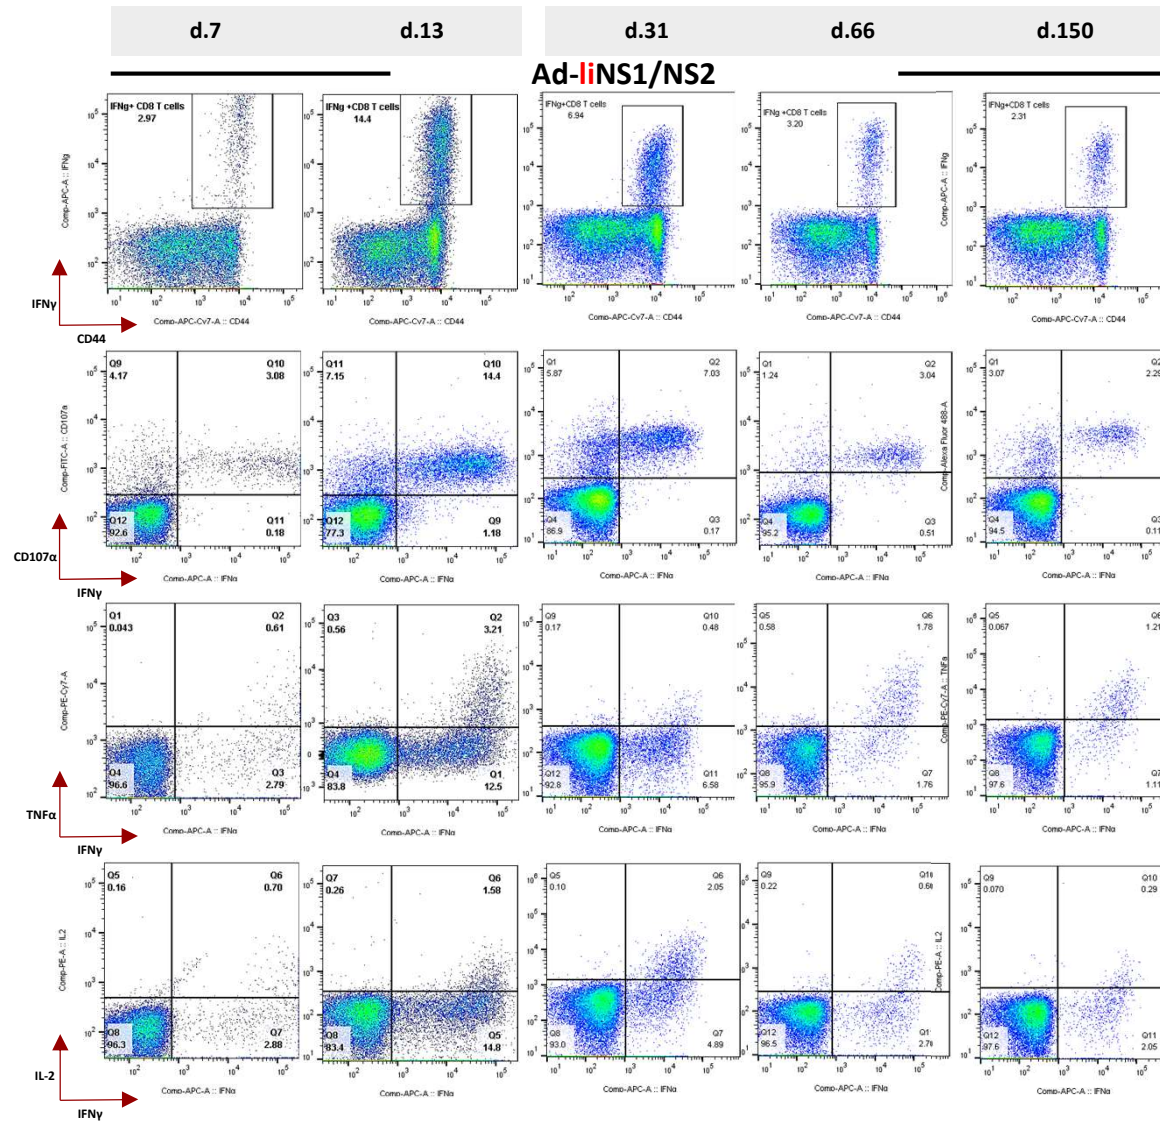

Figure S2: Representative plots: Ad-NS1/NS2 kinetics

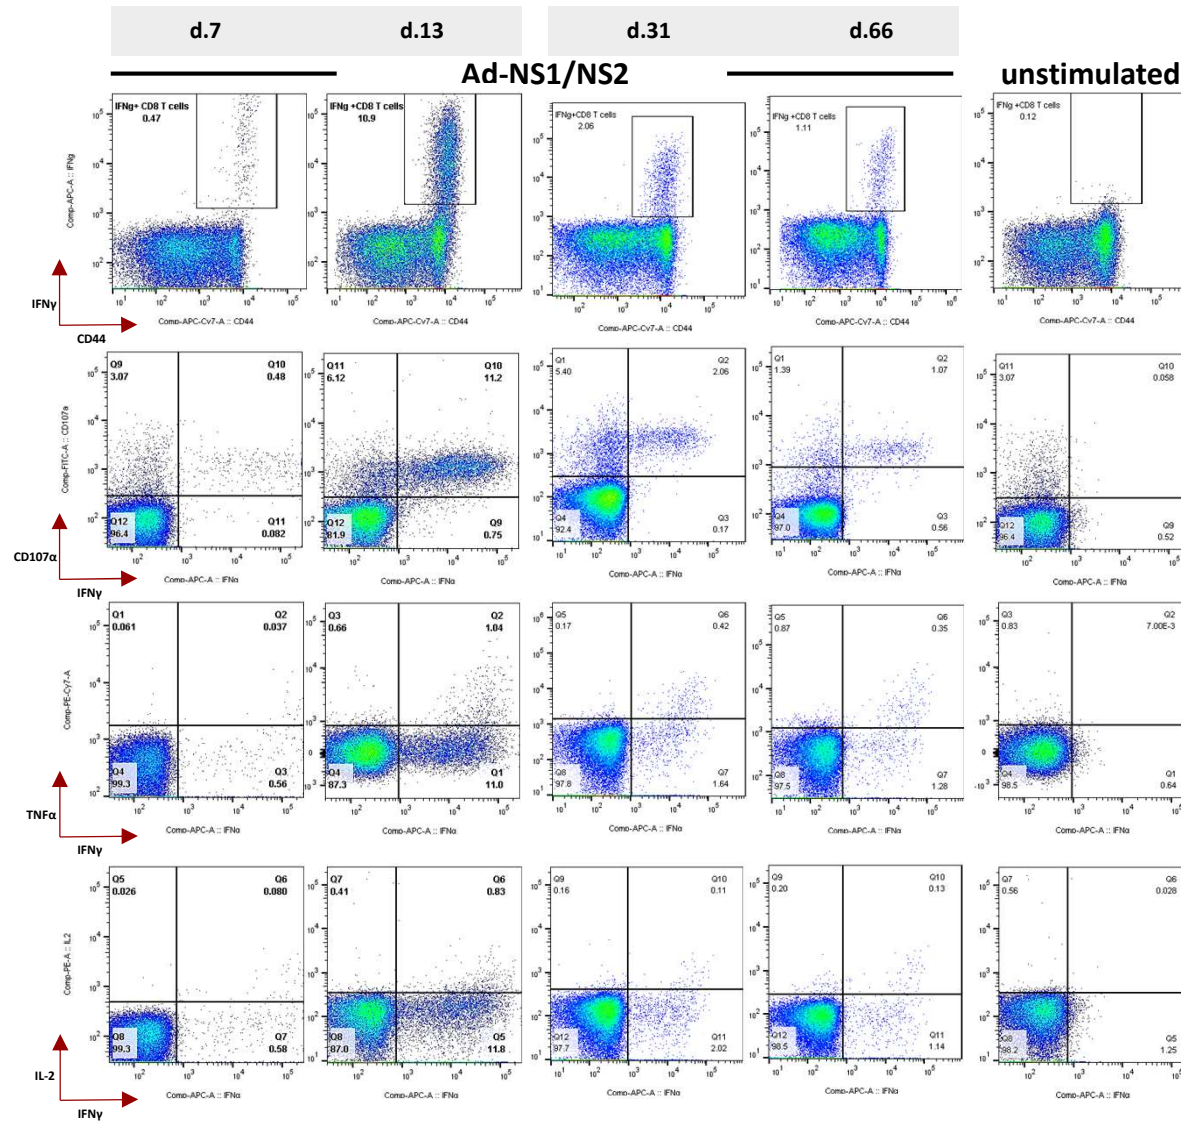

Supplement: s1 [file s1]
